# Supplementary material for: Carbon cycle feedbacks in an idealized simulation and a scenario simulation of negative emissions in CMIP6 Earth system models
Source: Copernicus journal article supplement (doi:10.5194/bg-21-411-2024), 2024-01-23
Supplement: Supplementary file 1 [file bg-21-411-2024-supplement.pdf]

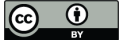

*Supplement of*

## **Carbon cycle feedbacks in an idealized simulation and a scenario simulation of negative emissions in CMIP6 Earth system models**

**Ali Asaadi et al.**

*Correspondence to:* Jörg Schwinger ([jrsc@norceresearch.no](mailto:jrsc@norceresearch.no))

The copyright of individual parts of the supplement might differ from the article licence.

## Supplementary Material

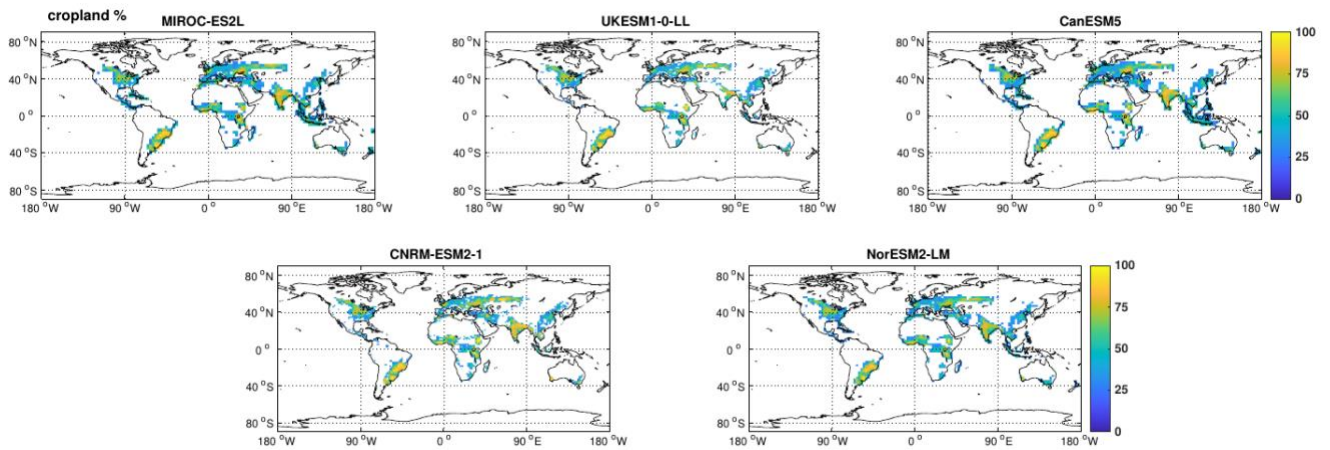

**Figure S1:** Global fractional cropland area distribution calculated as the maximum of the cropland area fraction between 2015 and 2100 for the ssp534-over scenario. Only fractions above 25% are shown.

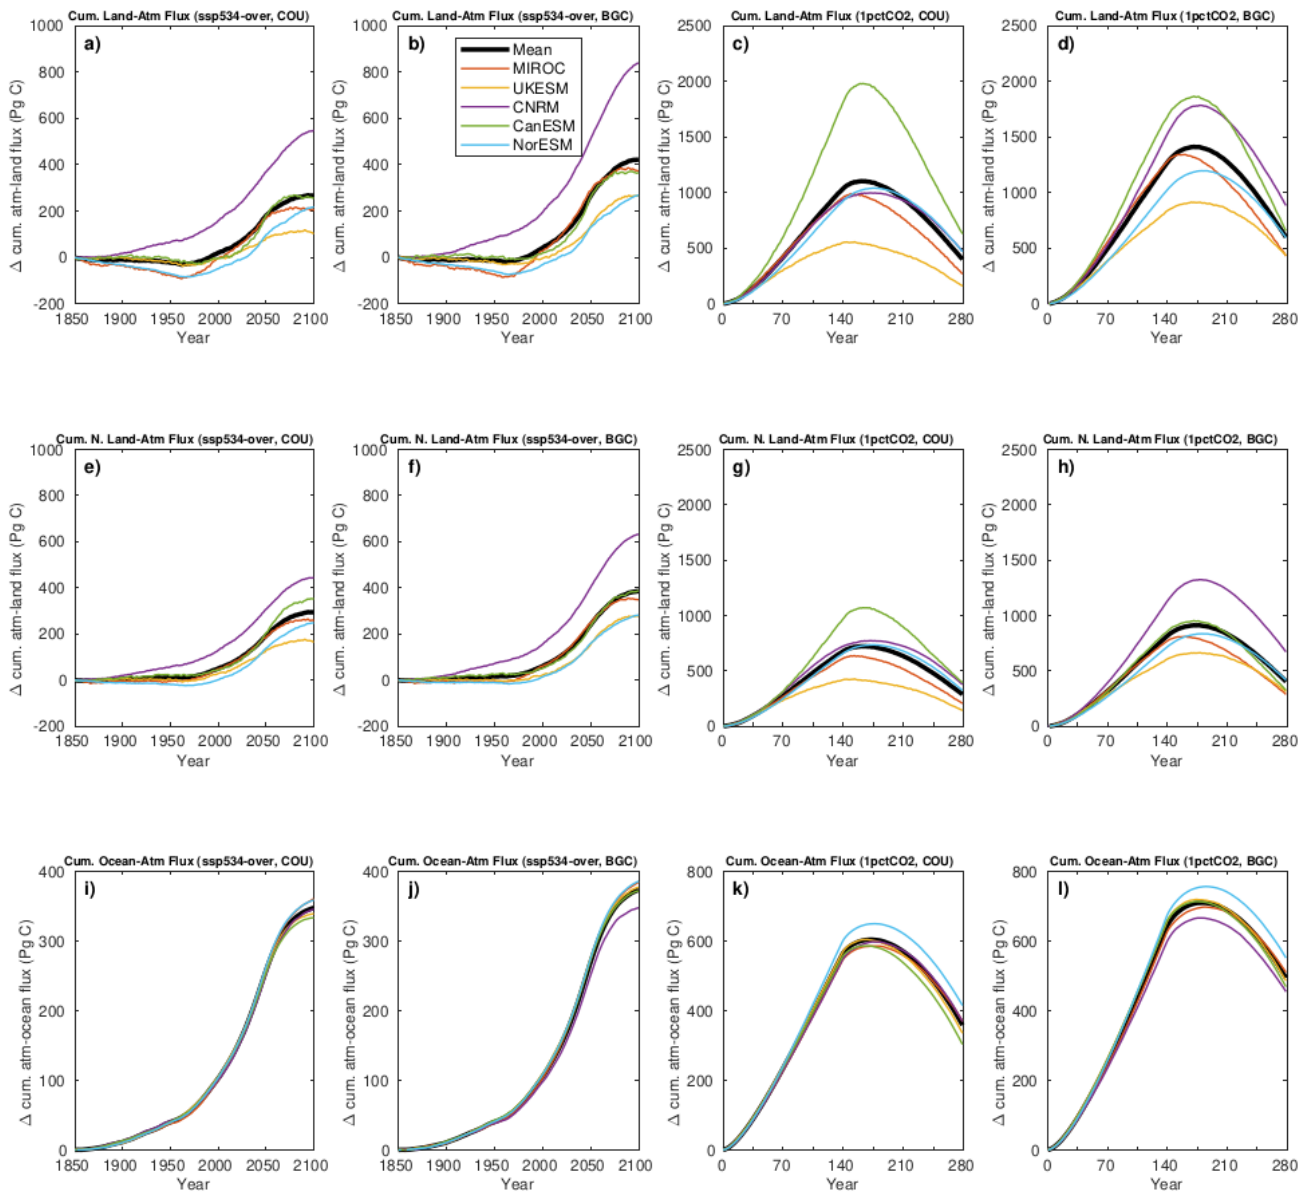

**Figure S2:** Annual time series of the global total (natural land plus cropland, and natural land only) cumulative land- and ocean-atmosphere carbon fluxes for the fully and biogeochemically coupled ssp534-over and 1pctCO2 experiments as indicated in the panel title.

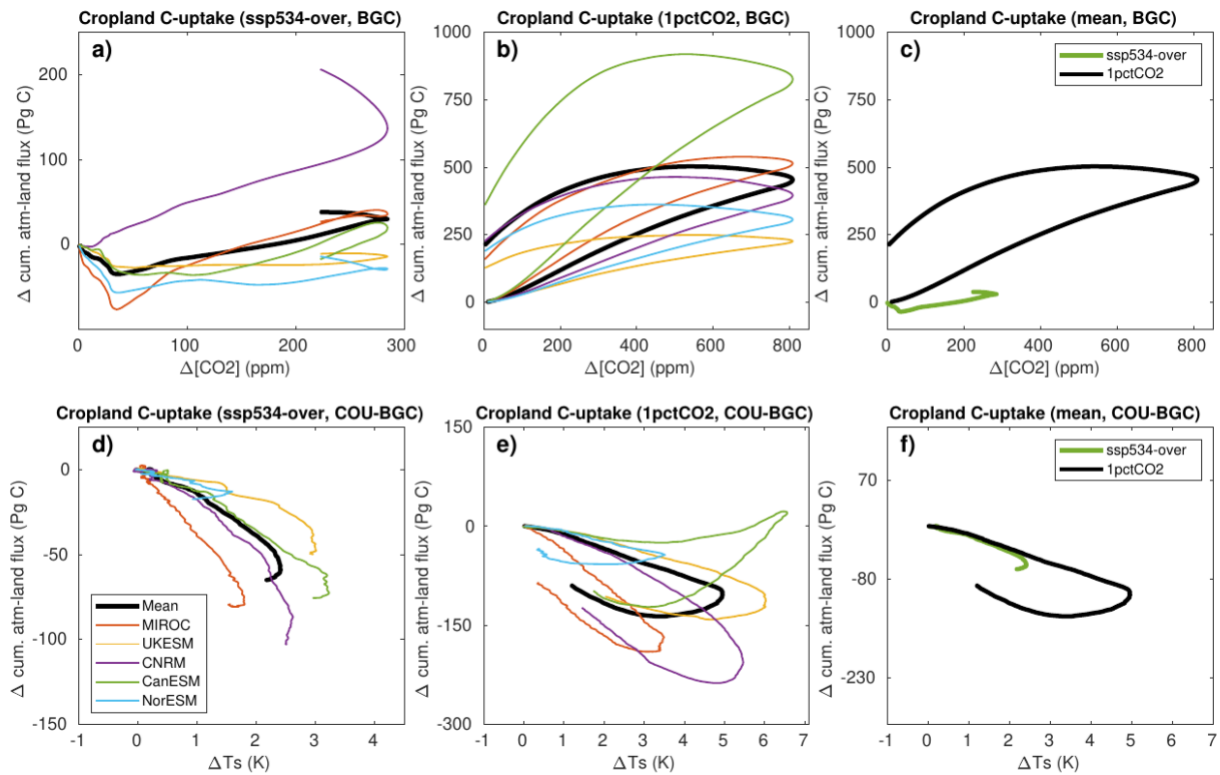

**Figure S3:** same as Fig. 4 but for grid-cells not dominated by natural vegetation in the ssp534-over simulation (“cropland”, more than a maximum of 25% crop fraction over the period 2015–2100). Note that, for this comparison, the same grid cells are considered in the 1pctCO2 simulation, even though land use stays at pre-industrial state.

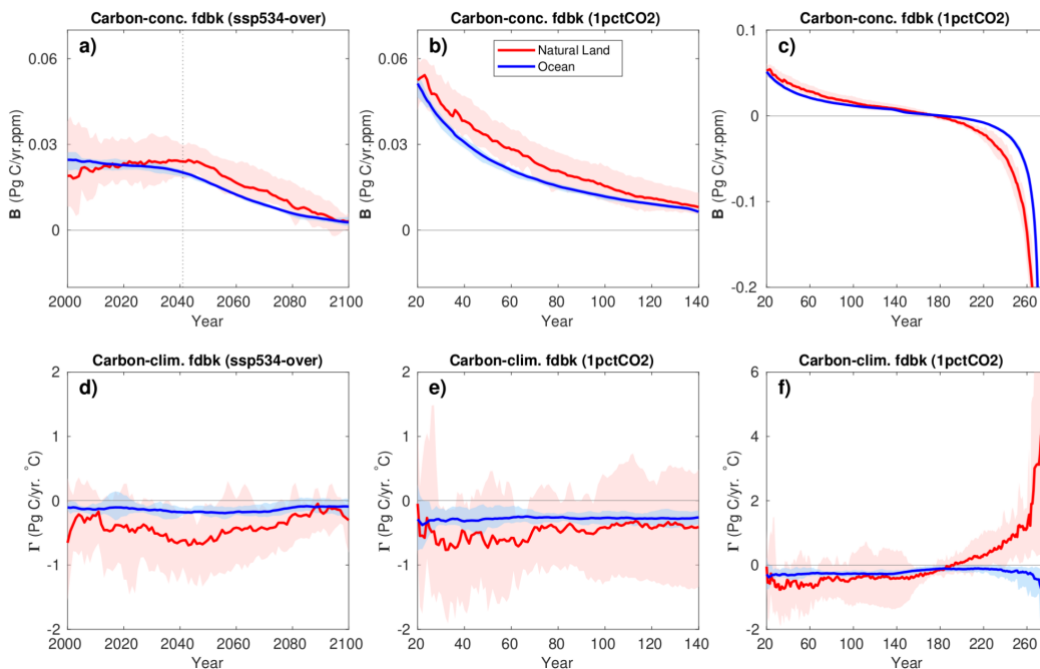

**Figure S4:** same as Fig. 5 but for the instantaneous flux-based feedback metrics.

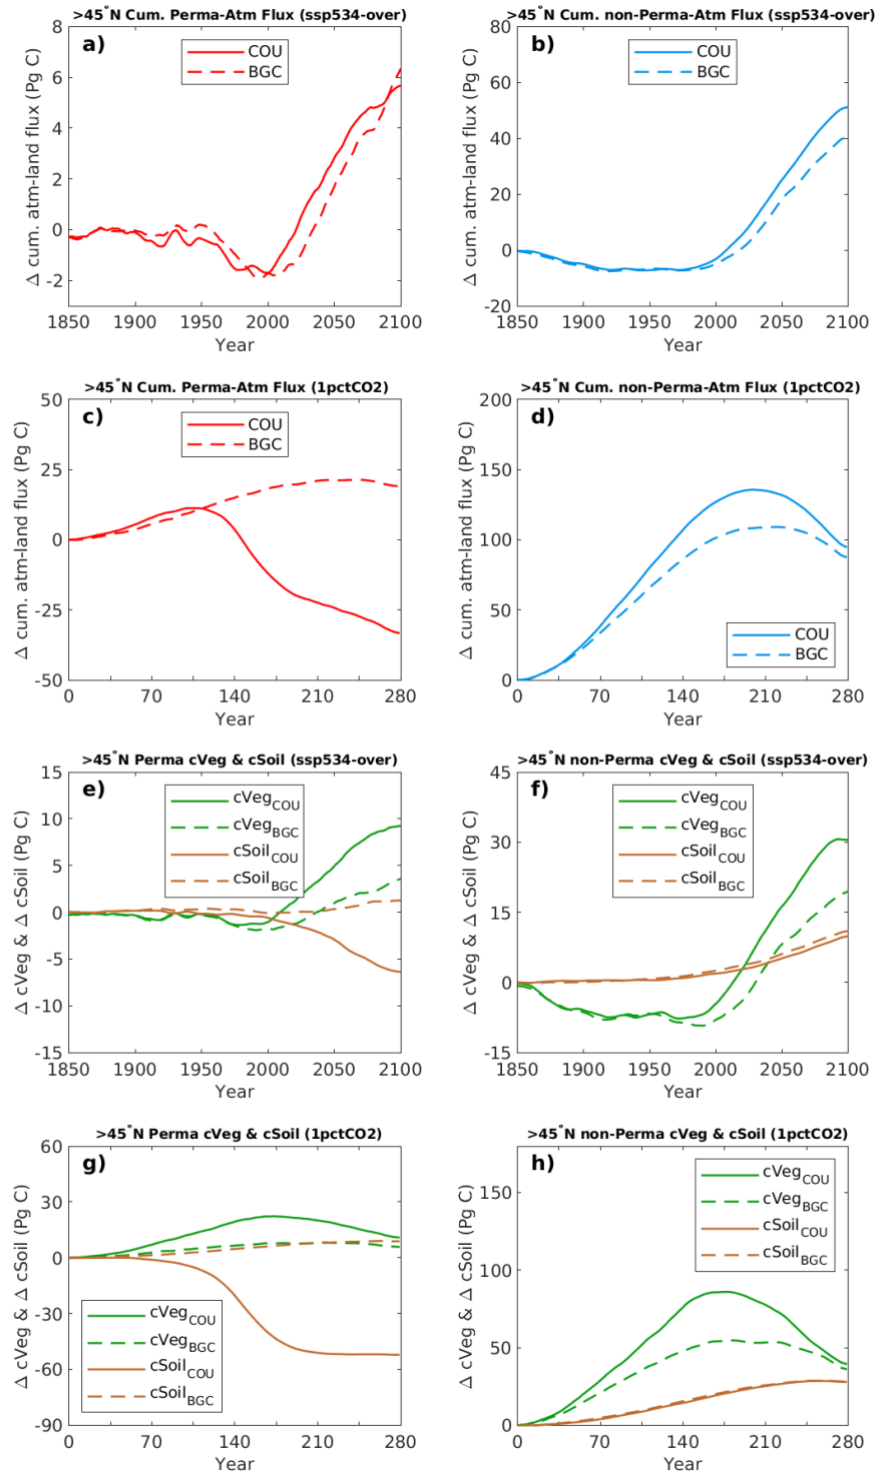

**Figure S5:** Annual time series of (a-d) the cumulative natural land-atmosphere carbon fluxes and (e-h) vegetation and soil carbon reservoirs over Northern Hemisphere high latitude natural permafrost and non-permafrost regions in the fully and biogeochemically coupled ssp534-over and 1pctCO<sub>2</sub> experiments using the NorESM model. An 11-year moving average has been used in all panels.



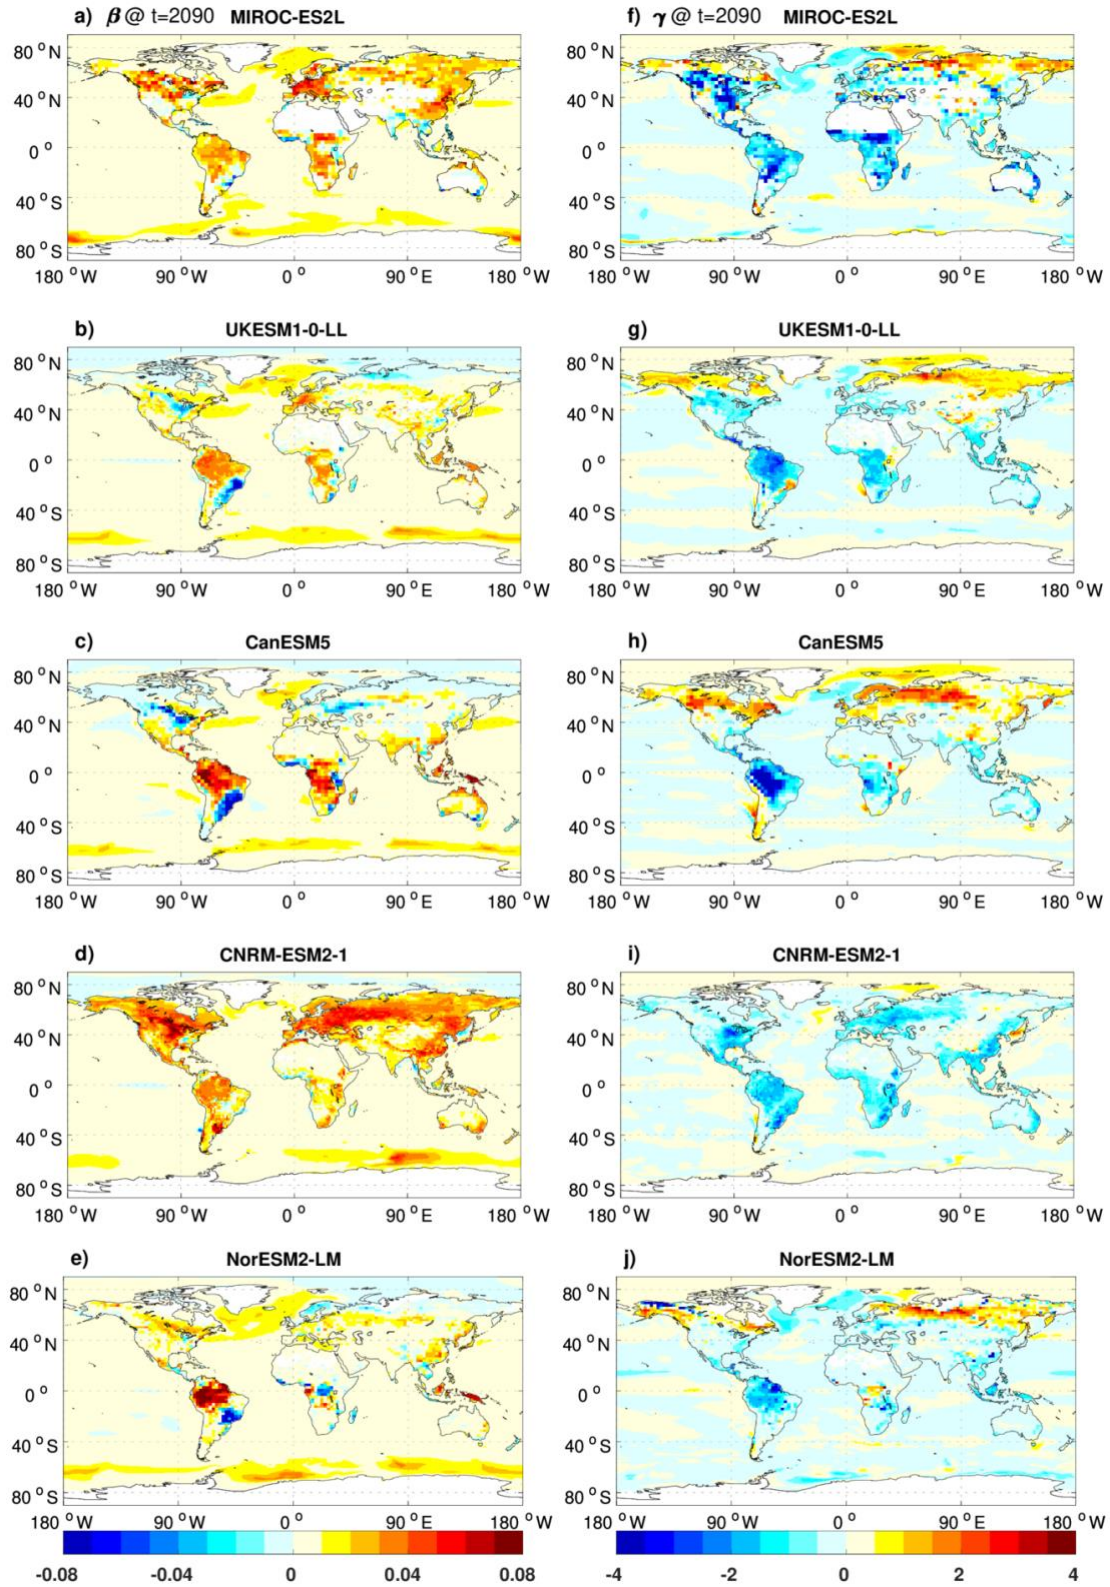

**Figure S6:** The spatial distribution of the integrated flux-based (a-e) carbon-concentration feedback (in  $\text{kg C m}^{-2} \text{ppm}^{-1}$ ), and (f-j) carbon-climate feedback (in  $\text{kg C m}^{-2} \text{°C}^{-1}$ ) at year 2090 on the decreasing side of the atmospheric  $\text{CO}_2$  concentration in the ssp534-over simulation.

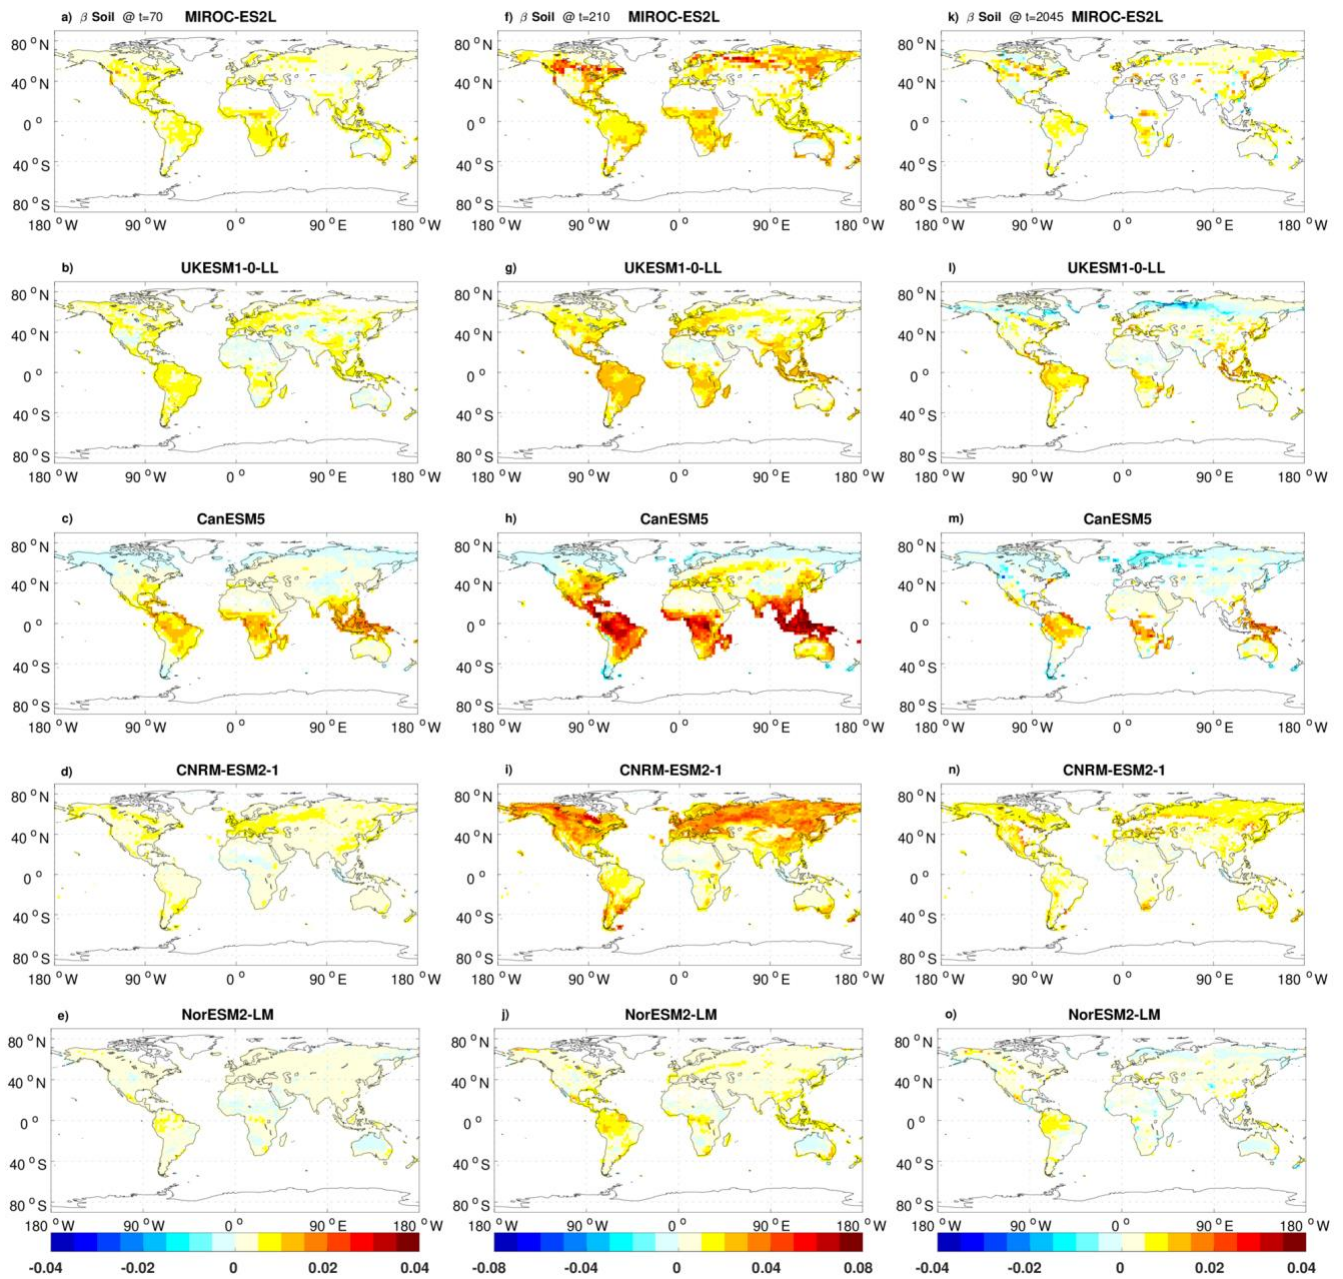

**Figure S7:** same as Fig. 9 but using soil carbon pool instead of the cumulative atmosphere-land flux.



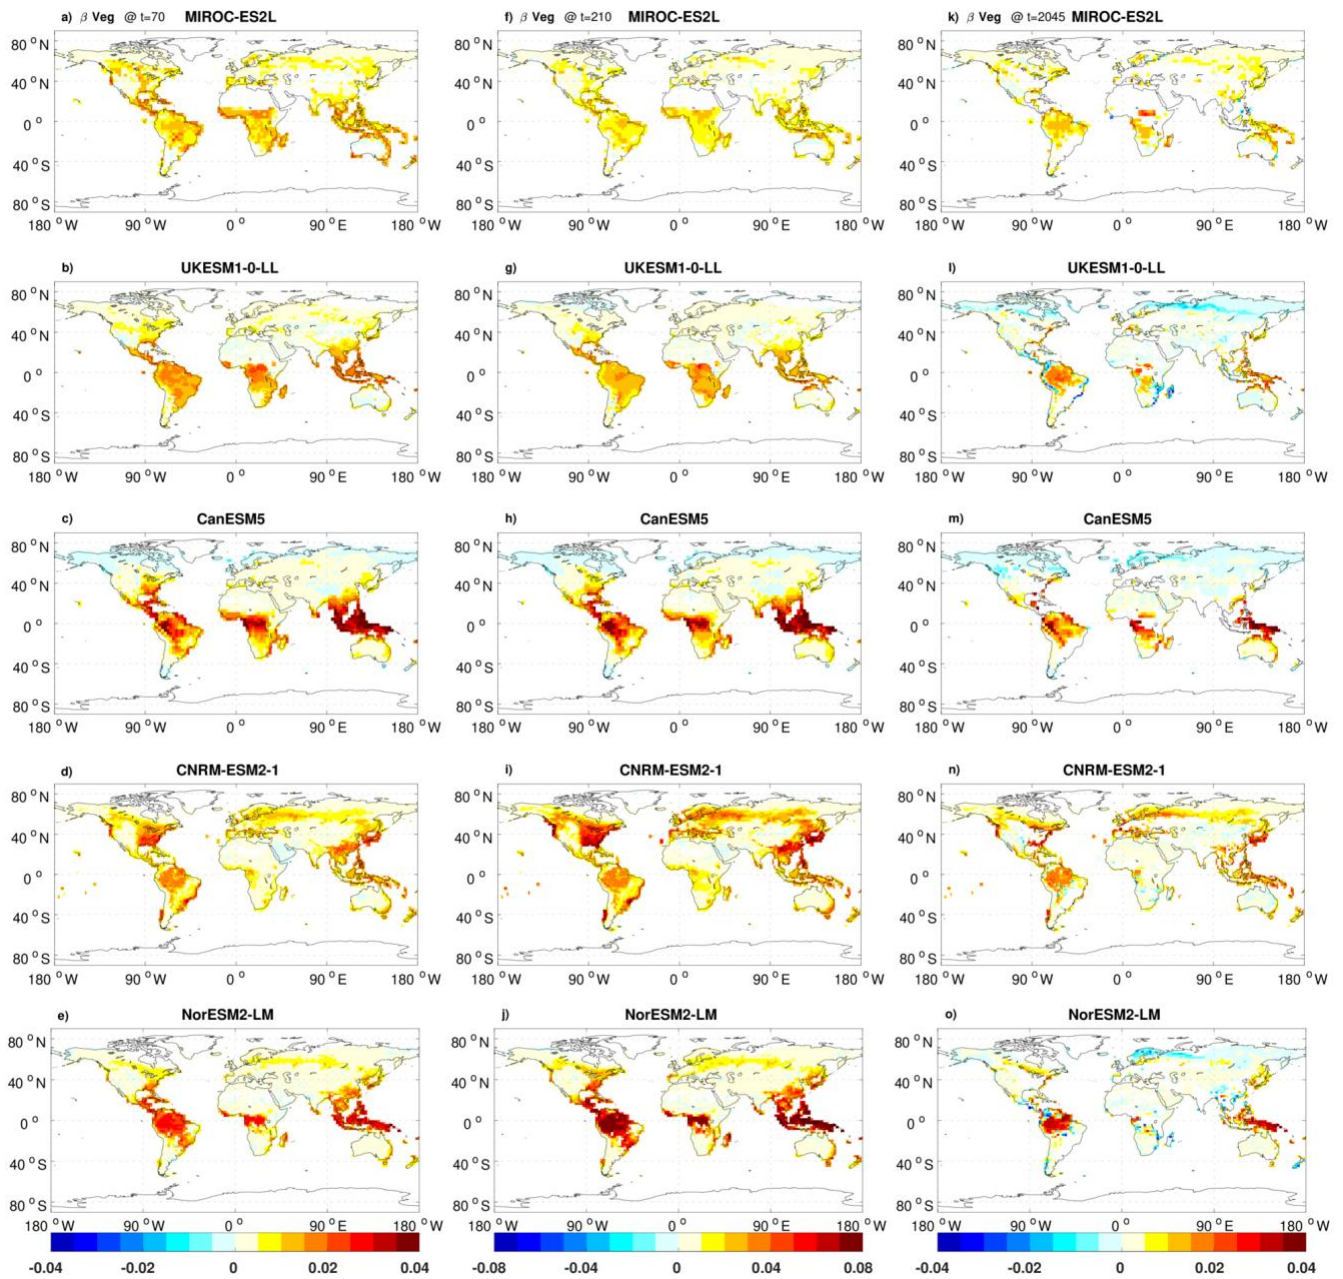

**Figure S8:** same as Fig. 9 but using vegetation carbon pool instead of the cumulative atmosphere-land flux.



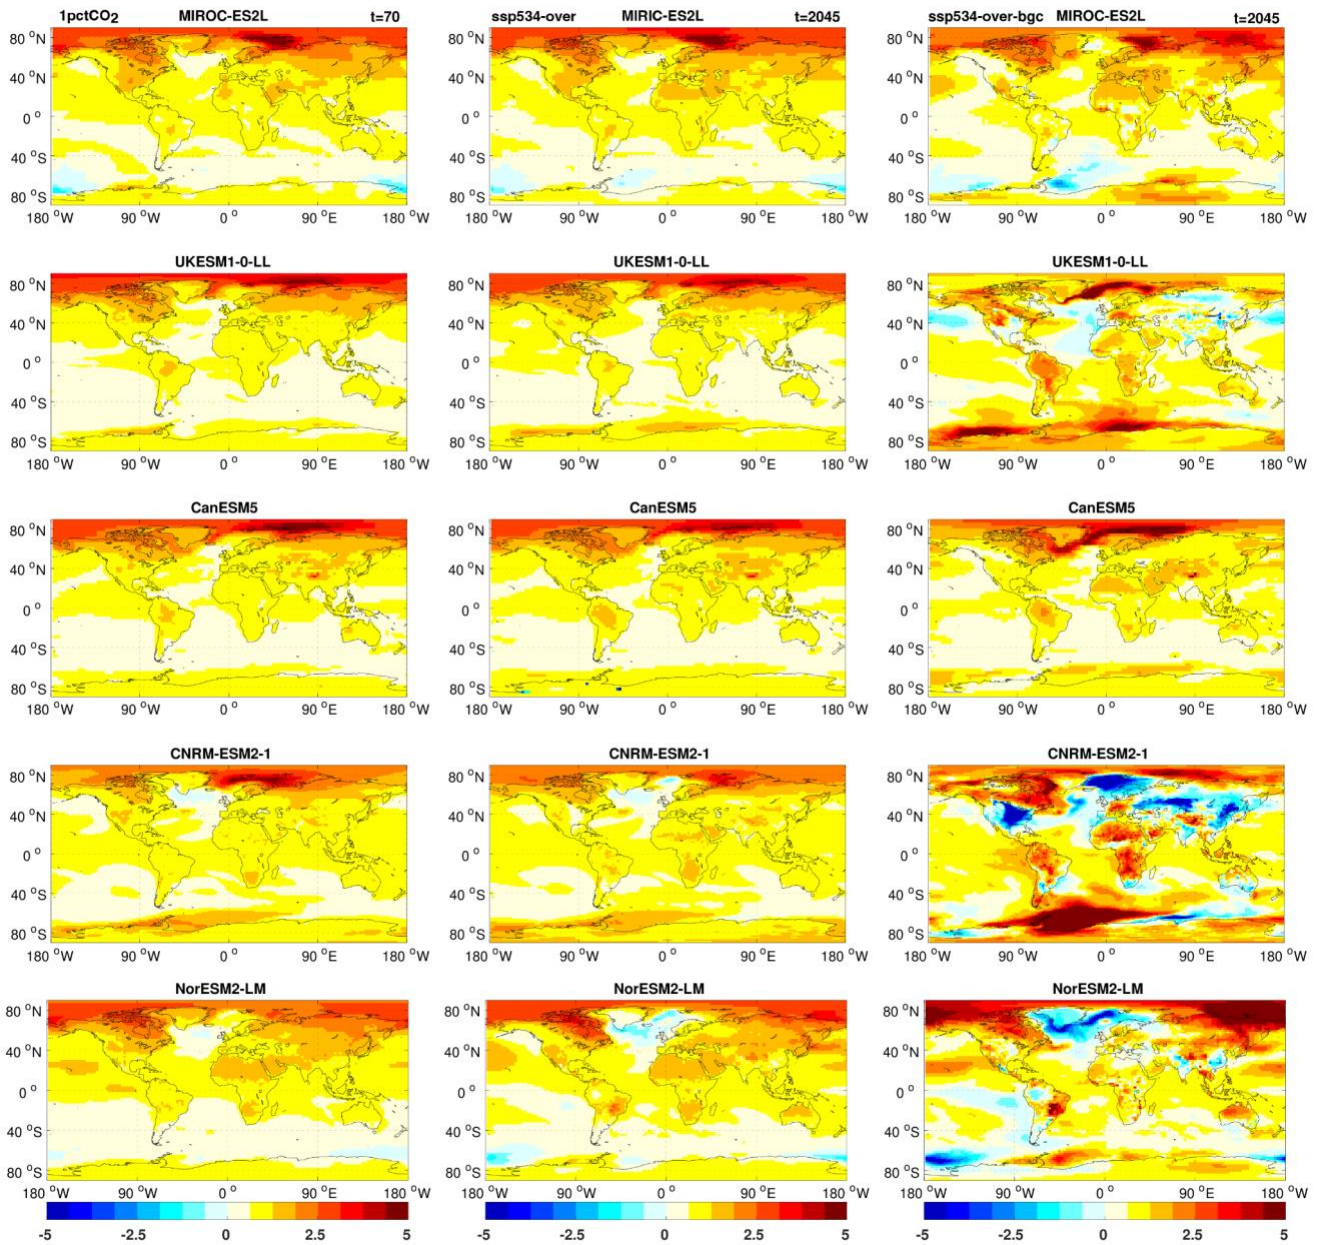

**Figure S9:**  $\Delta T$  normalized by its global mean value for individual models. Temperature deviations are averaged over 21-year time intervals centered on the year 70 for the fully coupled 1pctCO<sub>2</sub> experiment and the year 2045 both for the fully and biogeochemically coupled versions of the ssp534-over scenario. The BGC version of the ssp534-over simulation represents non-CO<sub>2</sub> induced radiative forcing, along with the effects of land-use changes. The fully coupled 1pctCO<sub>2</sub> represents only CO<sub>2</sub> induced warming.

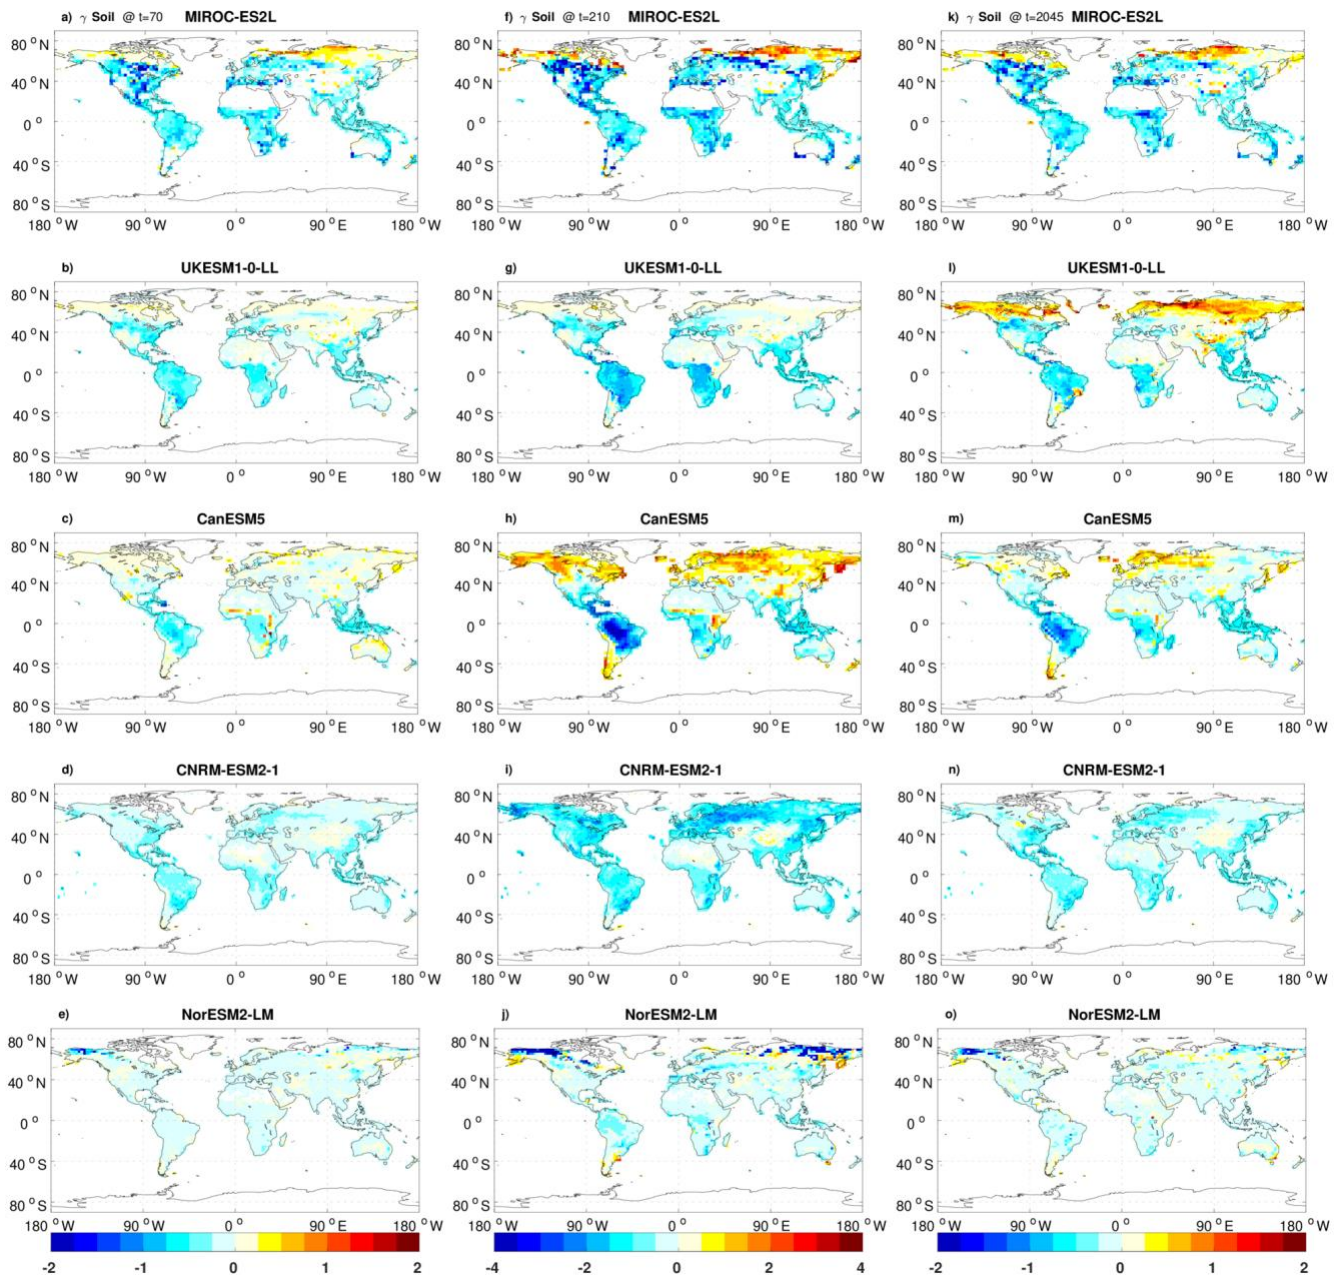

**Figure S10:** same as Fig. 10 but using soil carbon pool instead of the cumulative atmosphere-land flux.



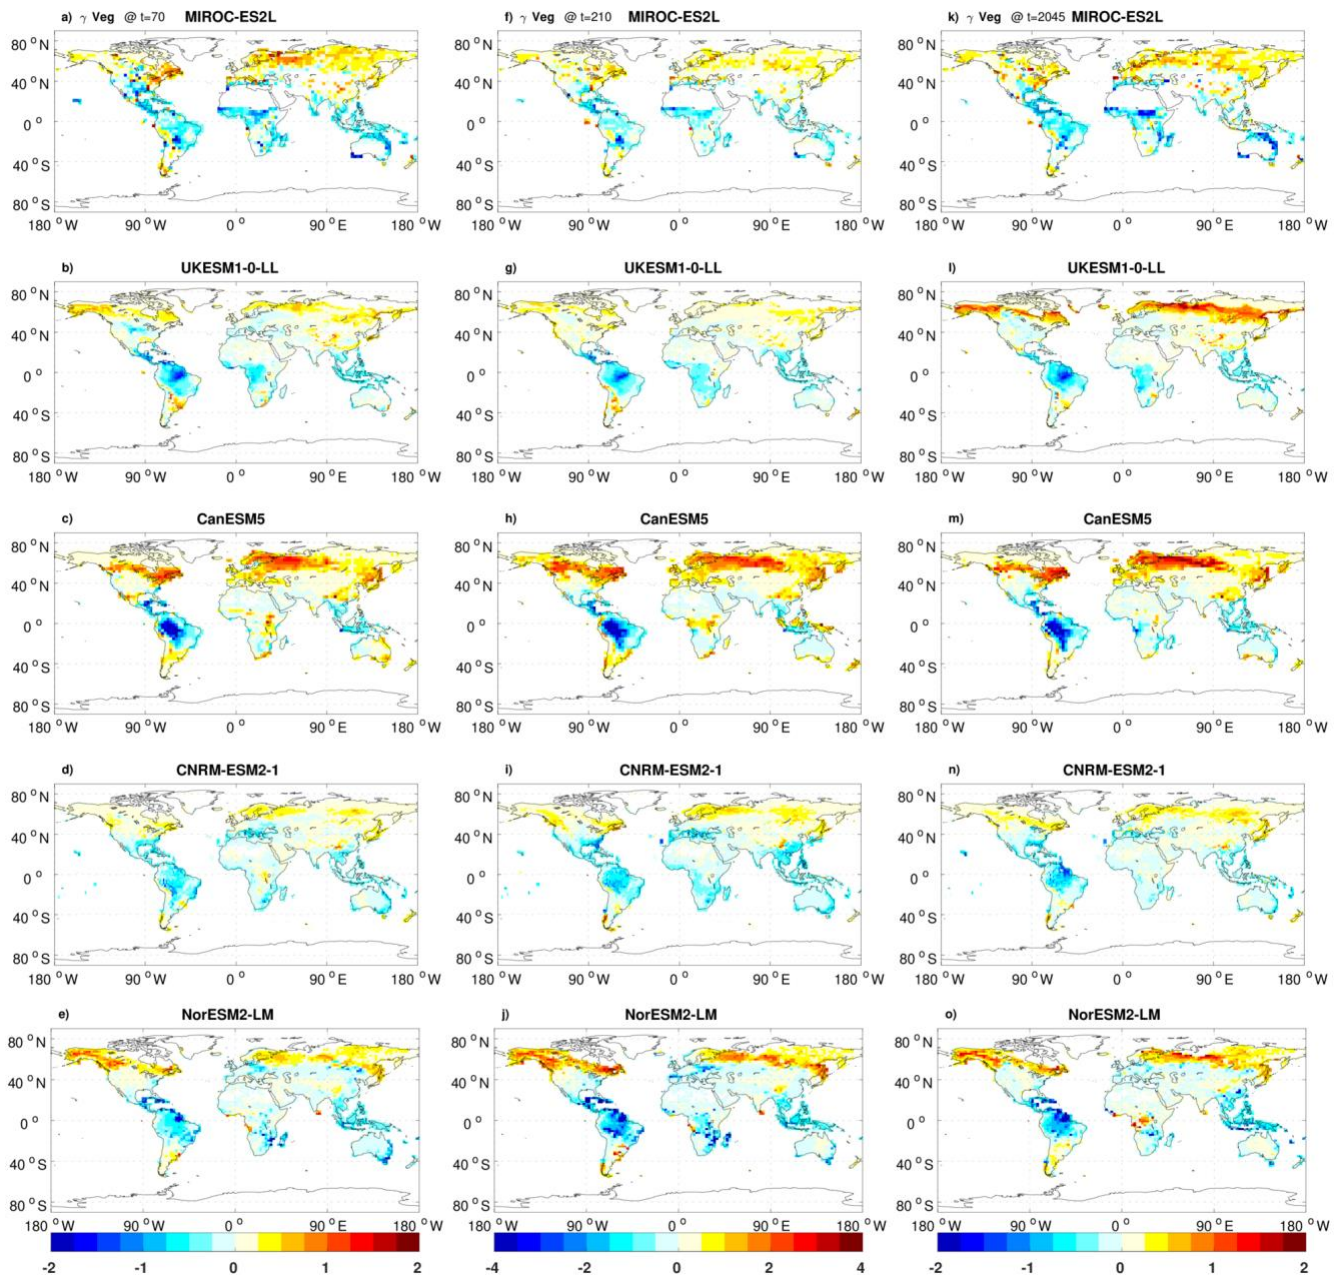

**Figure S11:** same as Fig. 10 but using vegetation carbon pool instead of the cumulative atmosphere-land flux.
